# Supplementary material for: A Comprehensive Analysis of Argonaute-CLIP Data Identifies Novel, Conserved and Species-Specific Targets of miR-21 in Human Liver and Hepatocellular Carcinoma
Source: PubMed Central journal article supplement (PMC5877712; doi:10.3390/ijms19030851), 2018-03-14
Supplement: ijms-19-00851-s001.pdf [file ijms-19-00851-s001.pdf]

Expression of miR-21 5'UTR Targets in HCC

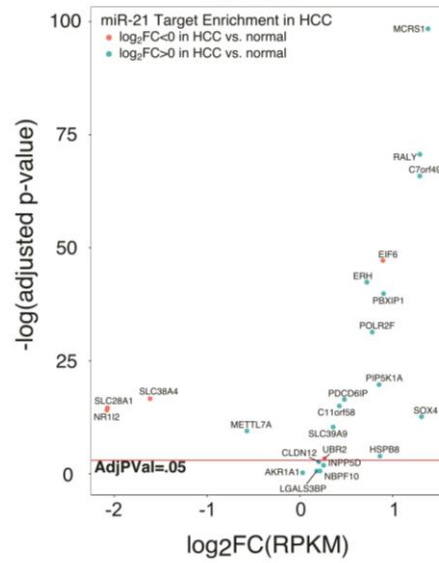

(a)

Expression of miR-21 Targets (other)

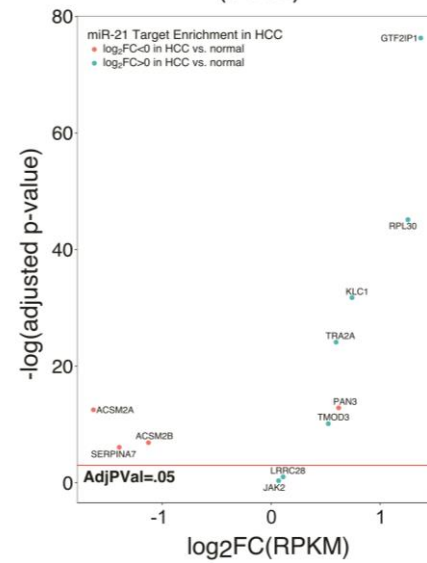

(b)

**Figure S1.** Expression of miR-21 targets not in CDS or 3'UTR. Volcano plot of gene expression for miR-21 5'UTR targets (a). Volcano plot of gene expression for miR-21 targets in introns, deep intergenic regions or downstream 10K (b).

**Table S1.** miR-21 binding sites in human and mouse homologs for 24 candidate miR-21 targets.

| Gene Name       | Full name                                                            | Number of miR-21 binding sites in mouse homolog | Number of miR-21 binding sites | Location of binding sites |
|-----------------|----------------------------------------------------------------------|-------------------------------------------------|--------------------------------|---------------------------|
| <i>ANKRD46</i>  | ankyrin repeat domain 46                                             | 0                                               | 1                              | 3'UTR                     |
| <i>ARL1</i>     | ADP ribosylation factor like GTPase 1                                | 0                                               | 1                              | 3'UTR                     |
| <i>ARRDC3</i>   | Arrestin-domain containing 3                                         | 1                                               | 0                              | 5'UTR                     |
|                 |                                                                      | 0                                               | 1                              | CDS                       |
|                 |                                                                      | 0                                               | 1                              | 3'UTR                     |
| <i>CAMSAP2</i>  | Calmodulin-regulated spectrin-associated protein family member 2     | 0                                               | 1                              | CDS                       |
| <i>CREB3L2</i>  | cAMP responsive element binding protein 3 like 2                     | 1                                               | 1                              | CDS                       |
| <i>DDAH1</i>    | Dimethylarginine dimethylaminohydrolase 1                            | 0                                               | 1                              | 3'UTR                     |
| <i>DDX1</i>     | DEAD-box helicase 1                                                  | 1                                               | 1                              | CDS                       |
| <i>DSTYK</i>    | Dual serine/threonine and tyrosine protein kinase                    | 0                                               | 1                              | CDS                       |
| <i>EGLN1</i>    | Egl-9 family hypoxia inducible factor 1                              | 0                                               | 1                              | 3'UTR                     |
| <i>GBP1</i>     | Guanylate-binding protein 1                                          | 0                                               | 1                              | 3'UTR                     |
| <i>GGCX</i>     | Gamma-glutamyl carboxylase                                           | 0                                               | 1                              | CDS                       |
| <i>MARCKSL1</i> | MARCKS like 1                                                        | 1                                               | 1                              | 3'UTR                     |
| <i>PAG1</i>     | Phosphoprotein membrane anchor with glycosphingolipid microdomains 1 | 1                                               | 1                              | 3'UTR                     |
| <i>PDZD8</i>    | PDZ domain containing 8                                              | 0                                               | 1                              | CDS                       |

| Gene Name      | Full name                                                                                         | Number of miR-21 binding sites in mouse homolog | Number of miR-21 binding sites | Location of binding sites |
|----------------|---------------------------------------------------------------------------------------------------|-------------------------------------------------|--------------------------------|---------------------------|
|                |                                                                                                   | 1                                               | 0                              | 3'UTR                     |
| <i>PLEKHA1</i> | Pleckstrin homology domain containing A1                                                          | 0                                               | 2                              | CDS                       |
|                |                                                                                                   | 1                                               | 0                              | 3'UTR                     |
| <i>RMND5A</i>  | Required for meiotic nuclear division 5 homolog A                                                 | 1                                               | 1                              | CDS                       |
|                |                                                                                                   | 2                                               | 0                              | 3'UTR                     |
| <i>SLC46A3</i> | Solute carrier family 46 member 3                                                                 | 0                                               | 1                              | 3'UTR                     |
| <i>SMARCE1</i> | SWI/SNF related, matrix associated, actin dependent regulator of chromatin, subfamily e, member 1 | 0                                               | 1                              | 3'UTR                     |
| <i>SPG20</i>   | Spastic paraplegia 20 (Troyer syndrome)                                                           | 0                                               | 1                              | 3'UTR                     |
| <i>TBC1D4</i>  | TBC1 domain family member 4                                                                       | 0                                               | 1                              | 3'UTR                     |
| <i>TGFBR2</i>  | Transforming growth factor beta receptor 2                                                        | 1                                               | 1                              | 3'UTR                     |
| <i>THBS1</i>   | Thrombospondin 1                                                                                  | 0                                               | 1                              | 3'UTR                     |
| <i>TIMP3</i>   | TIMP metalloproteinase inhibitor 3                                                                | 0                                               | 2                              | CDS                       |
|                |                                                                                                   | 0                                               | 1                              | 3'UTR                     |
| <i>TPRG1L</i>  | Tumor protein p63 regulated 1 like                                                                | 1                                               | 1                              | 3'UTR                     |

**Table S2.** Protein function and canonical pathway involvement for 24 candidate miR-21 targets. Data from Ingenuity KnowledgeBase.

| Gene Name       | Full name                                                            | Protein Function/Functional Domains                                                                                                                                                                                                                       | Canonical Pathways                                   |
|-----------------|----------------------------------------------------------------------|-----------------------------------------------------------------------------------------------------------------------------------------------------------------------------------------------------------------------------------------------------------|------------------------------------------------------|
| <i>ANKRD46</i>  | ankyrin repeat domain 46                                             | Transcription regulator                                                                                                                                                                                                                                   | -                                                    |
| <i>ARL1</i>     | ADP ribosylation factor like GTPase 1                                | Enzyme, enzyme activator activity, GTPase, GTP binding, GTP binding domain-switch II region, protein domain specific binding                                                                                                                              | -                                                    |
| <i>ARRDC3</i>   | Arrestin-domain containing 3                                         | G-protein-coupled receptor binding, PPXY motif, protein binding                                                                                                                                                                                           | -                                                    |
| <i>CAMSAP2</i>  | Calmodulin-regulated spectrin-associated protein family member 2     | Microtubule binding, protein binding                                                                                                                                                                                                                      | -                                                    |
| <i>CREB3L2</i>  | cAMP responsive element binding protein 3 like 2                     | DNA binding, double-stranded DNA binding, nucleic acid binding, RNA polymerase II core promoter proximal region sequence-specific binding transcriptional activator activity, sequence-specific DNA binding, transcription regulator                      | -                                                    |
| <i>DDAH1</i>    | Dimethylarginine dimethylaminohydrolase 1                            | Amidino transferase, amino acid binding, dimethylarginase, enzyme, zinc ion binding                                                                                                                                                                       | -                                                    |
| <i>DDX1</i>     | DEAD-box helicase 1                                                  | ATP-dependent helicase, chromatin binding, double-stranded RNA binding, enzyme, helicase, nuclease, poly(A)-binding protein, protein binding, RNA binding, RNA helicase, transcription cofactor                                                           | -                                                    |
| <i>DSTYK</i>    | Dual serine/threonine and tyrosine protein kinase                    | Kinase, protein threonine/tyrosine kinase                                                                                                                                                                                                                 | -                                                    |
| <i>EGLN1</i>    | Egl-9 family hypoxia inducible factor 1                              | 2-oxoglutarate:oxygen oxidoreductase, enzyme, enzyme binding, protein binding                                                                                                                                                                             | HIF1 $\alpha$ signaling                              |
| <i>GBP1</i>     | Guanylate-binding protein 1                                          | Actin binding, cytokine binding, enzyme, enzyme binding, GDP binding, GMP binding, GTPase, GTPase domain, GTP binding, heat shock protein binding, helical domain, identical protein binding, protein binding, protein homodimerization, spectrin binding | --                                                   |
| <i>GGCX</i>     | Gamma-glutamyl carboxylase                                           | Enzyme, gamma-glutamyl carboxylase                                                                                                                                                                                                                        | -                                                    |
| <i>MARCKSL1</i> | MARCKS like 1                                                        | Effector domain, protein binding                                                                                                                                                                                                                          | -                                                    |
| <i>PAG1</i>     | Phosphoprotein membrane anchor with glycosphingolipid microdomains 1 | Csk binding site, cytoplasmic domain, extracellular domain, membrane-association domain, palmitoylation site, protein binding, SH2-domain binding, transmembrane domain, transmembrane receptor protein tyrosine kinase adaptor protein                   | B cell receptor signaling, T cell receptor signaling |
| <i>PDZD8</i>    | PDZ domain containing 8                                              | Coiled-coil domain                                                                                                                                                                                                                                        | -                                                    |

| Gene Name      | Full name                                                                                         | Protein Function/Functional Domains                                                                                                                                                                                                                                                                                                                                                                                                                                                                                                                                                                                                                                                      | Canonical Pathways                                                                                                                                                                                                                                                                                                                                                                                                                                                                                                                                                                                                                                                                                                                                                                                                                                           |
|----------------|---------------------------------------------------------------------------------------------------|------------------------------------------------------------------------------------------------------------------------------------------------------------------------------------------------------------------------------------------------------------------------------------------------------------------------------------------------------------------------------------------------------------------------------------------------------------------------------------------------------------------------------------------------------------------------------------------------------------------------------------------------------------------------------------------|--------------------------------------------------------------------------------------------------------------------------------------------------------------------------------------------------------------------------------------------------------------------------------------------------------------------------------------------------------------------------------------------------------------------------------------------------------------------------------------------------------------------------------------------------------------------------------------------------------------------------------------------------------------------------------------------------------------------------------------------------------------------------------------------------------------------------------------------------------------|
| <i>PLEKHA1</i> | Pleckstrin homology domain containing A1                                                          | PDZ-domain binding, phosphatidylinositol binding, protein binding                                                                                                                                                                                                                                                                                                                                                                                                                                                                                                                                                                                                                        | iCOS-iCOSL Signaling in T helper Cells; PI3K Signaling in B lymphocytes                                                                                                                                                                                                                                                                                                                                                                                                                                                                                                                                                                                                                                                                                                                                                                                      |
| <i>RMND5A</i>  | Required for meiotic nuclear division 5 homolog A                                                 | Protein binding                                                                                                                                                                                                                                                                                                                                                                                                                                                                                                                                                                                                                                                                          | --                                                                                                                                                                                                                                                                                                                                                                                                                                                                                                                                                                                                                                                                                                                                                                                                                                                           |
| <i>SLC46A3</i> | Solute carrier family 46 member 3                                                                 | -                                                                                                                                                                                                                                                                                                                                                                                                                                                                                                                                                                                                                                                                                        | -                                                                                                                                                                                                                                                                                                                                                                                                                                                                                                                                                                                                                                                                                                                                                                                                                                                            |
| <i>SMARCE1</i> | SWI/SNF related, matrix associated, actin dependent regulator of chromatin, subfamily e, member 1 | Acidic domain, chromatin binding, coiled-coil domain, ligand-dependent nuclear receptor interactor, N-acetyltransferase, NHRLI domain, nuclear localization sequence, proline-rich domain, protein binding, protein N-terminus binding, RNA binding, transcription regulator                                                                                                                                                                                                                                                                                                                                                                                                             | AMPK signaling, glucocorticoid receptor signaling, hereditary breast cancer signaling, RAR activation, role of BRCA1 in DNA damage response                                                                                                                                                                                                                                                                                                                                                                                                                                                                                                                                                                                                                                                                                                                  |
| <i>SPG20</i>   | Spastic paraplegia 20 (Troyer syndrome)                                                           | MIT domain, protein binding, ubiquitin protein ligase binding                                                                                                                                                                                                                                                                                                                                                                                                                                                                                                                                                                                                                            | -                                                                                                                                                                                                                                                                                                                                                                                                                                                                                                                                                                                                                                                                                                                                                                                                                                                            |
| <i>TBC1D4</i>  | TBC1 domain family member 4                                                                       | Phosphotyrosine-binding domain, protein binding                                                                                                                                                                                                                                                                                                                                                                                                                                                                                                                                                                                                                                          | -                                                                                                                                                                                                                                                                                                                                                                                                                                                                                                                                                                                                                                                                                                                                                                                                                                                            |
| <i>TGFBR2</i>  | Transforming growth factor beta receptor 2                                                        | Cytoplasmic domain, cytoplasmic kinase domain, cytosolic tail domain, extracellular domain, glycosaminoglycan binding, intracellular domain, kinase, kinase domain membrane-proximal domain, N-linked glycosylation site, protein binding, protein heterodimerization, protein homodimerization, protein kinase binding, protein serine/threonine kinase, serine/threonine kinase domain, SMAD binding, tail domain, TGFbeta binding, transforming growth factor-beta receptor, transforming growth factor-beta receptor binding, transmembrane domain, transmembrane receptor, transmembrane receptor protein serine/threonine kinase, type II transforming growth factor-beta receptor | Antiproliferative role of TOB in T cell signaling, cardiac hypertrophy signaling, chronic myeloid leukemia signaling, colorectal cancer metastasis signaling, epithelial adherens junction signaling, factors promoting cardiogenesis in vertebrates, germ cell-Sertoli cell junction signaling, glucocorticoid receptor signaling, hepatic fibrosis/stellate cell activation, human embryonic stem cell pluripotency, inhibition of angiogenesis by TSP1, molecular mechanisms of cancer, NF-κB signaling, osteoarthritis pathway, p38 MAPK signaling, pancreatic adenocarcinoma signaling, PPARα/RXRα activation, protein kinase A signaling, PTEN signaling, regulation of IL-2 expression in activated and anergic T lymphocytes, regulation of the epithelial-mesenchymal transition pathway, role of NFAT in cardiac hypertrophy, STAT3 pathway, TGF-β |

| Gene Name     | Full name                          | Protein Function/Functional Domains                                                                                                                                                                                                                                                                                                                                                                                                                                                                                                                                                                                                                                                                                                                                                                                              | Canonical Pathways                                                                                                                                        |
|---------------|------------------------------------|----------------------------------------------------------------------------------------------------------------------------------------------------------------------------------------------------------------------------------------------------------------------------------------------------------------------------------------------------------------------------------------------------------------------------------------------------------------------------------------------------------------------------------------------------------------------------------------------------------------------------------------------------------------------------------------------------------------------------------------------------------------------------------------------------------------------------------|-----------------------------------------------------------------------------------------------------------------------------------------------------------|
|               |                                    |                                                                                                                                                                                                                                                                                                                                                                                                                                                                                                                                                                                                                                                                                                                                                                                                                                  | signaling, Th1 and Th2 activation pathway, Th2 pathway, T helper cell differentiation, tight junction signaling, Wnt/ $\beta$ -catenin signaling          |
| <i>THBS1</i>  | Thrombospondin 1                   | Alpha3 beta1 integrin-binding domain, binding protein, calcium binding loop, CD36-binding domain, cell-binding domain, collagen binding, EGF-like domain, extracellular matrix binding, fibroblast growth factor binding, fibronectin binding, globular domain, glycoprotein binding, heparin binding, heparin binding domain, IAP binding domain, integrin binding, laminin binding, L-lectin like domain, low-density lipoprotein binding, oligomerization domain, phospholipid binding, procollagen-like segment, protein binding, protein complex binding, signal peptide, stalk region, TGFbeta binding, thrombospondin-1 motif, thrombospondin properdin-like repeat, thrombospondin type 1 repeat, thrombospondin type 2 repeat, thrombospondin type 1 repeat, thrombospondin type 2 repeat, thrombospondin type 3 repeat | Bladder cancer signaling, inhibition of angiogenesis by TSP1, p53 signaling                                                                               |
| <i>TIMP3</i>  | TIMP metalloproteinase inhibitor 3 | Metalloendopeptidase inhibitor, protein binding                                                                                                                                                                                                                                                                                                                                                                                                                                                                                                                                                                                                                                                                                                                                                                                  | Glioma invasiveness signaling, inhibition of matrix metalloproteinases, leukocyte extravasation signaling, oncostatin M signaling, osteoarthritis pathway |
| <i>TPRG1L</i> | Tumor protein p63 regulated 1 like | Identical protein binding, protein binding                                                                                                                                                                                                                                                                                                                                                                                                                                                                                                                                                                                                                                                                                                                                                                                       | --                                                                                                                                                        |
